# Supplementary material
Source: MDPI journal article supplement (https://www.mdpi.com/2571-6255/5/6/193)
Supplement: s1 [file s1]

**Title:** The demographic response of grass species to fire treatments in a Guinean savanna

## **Supplementary Materials**

### **Tables**

**Table S1:** Value of the Keyfitz metric ( $\Delta$ ) showing the distances between the observed and predicted size-class distribution for all species under each fire treatment.

| Species                         | Early fire | Mid-season fire | Late fire | No-fire |
|---------------------------------|------------|-----------------|-----------|---------|
| <i>Andropogon canaliculatus</i> | 0.06       | 0.205           | 0.025     | 0.07    |
| <i>Andropogon schirensis</i>    | 0.105      | 0.11            | 0.145     | 0.12    |
| <i>Hyparrhenia diplandra</i>    | 0.035      | 0.08            | 0.065     | 0.065   |
| <i>Loudetia simplex</i>         | 0.135      | 0.23            | 0.125     | -       |

**Table S2:** Age-based parameters of the average matrix model for the four grass species under each fire treatment. Values are mean  $\pm$  standard deviation and the mean of the five size-classes (Mean).  $y_i$  = mean age in each size-class under the hypothesis of stable size distribution,  $S_i$  = mean age of residence in the  $i^{\text{th}}$  class,  $\tau_{1,i}$  = mean time to first reach the  $i^{\text{th}}$  class from the class 1,  $\Omega_i$  = the conditional remaining life-span of individuals in the  $i^{\text{th}}$  class and  $\Lambda_i$  = total conditional life-span if class  $i$  have been reached. Calculations were based on the average matrix calculated over four one-year transitions.

*Andropogon canaliculatus*

|                 | $y_i$           | $S_i$           | $\tau_{1,i}$    | $\Omega_i$      | $\Lambda_i$      |
|-----------------|-----------------|-----------------|-----------------|-----------------|------------------|
| Early fire      |                 |                 |                 |                 |                  |
| Class 1         | 47.4 $\pm$ 56.6 | 17.5 $\pm$ 23.6 | 8.3 $\pm$ 13.7  | 16.7 $\pm$ 62.1 | 25.1 $\pm$ 75.9  |
| Class 2         | 57.8 $\pm$ 57.7 | 25.6 $\pm$ 25.3 | 8.8 $\pm$ 8.8   | 20.3 $\pm$ 68.3 | 29.1 $\pm$ 77.2  |
| Class 3         | 59.8 $\pm$ 57.8 | 27.5 $\pm$ 25.4 | 9.7 $\pm$ 8.1   | 26.5 $\pm$ 78.0 | 36.2 $\pm$ 86.2  |
| Class 4         | 61.0 $\pm$ 57.8 | 28.6 $\pm$ 25.5 | 13.6 $\pm$ 11.1 | 31.7 $\pm$ 85.5 | 45.4 $\pm$ 96.6  |
| Class 5         | 60.5 $\pm$ 57.8 | 28.0 $\pm$ 25.5 | 10.9 $\pm$ 9.4  | 40.7 $\pm$ 95.9 | 51.7 $\pm$ 105.3 |
| Mean            | 57.3            | 25.4            | 10.2            | 27.1            | 37.5             |
| Mid-season fire |                 |                 |                 |                 |                  |
| Class 1         | 30.7 $\pm$ 36.8 | 12.0 $\pm$ 15.9 | 4.7 $\pm$ 8.0   | 11.3 $\pm$ 39.9 | 16.1 $\pm$ 48.0  |
| Class 2         | 38.7 $\pm$ 37.8 | 18.3 $\pm$ 17.2 | 4.7 $\pm$ 4.0   | 18.3 $\pm$ 50.9 | 23.1 $\pm$ 55.0  |
| Class 3         | 41.1 $\pm$ 37.9 | 20.4 $\pm$ 17.3 | 8.6 $\pm$ 6.3   | 21.7 $\pm$ 55.7 | 30.3 $\pm$ 62.0  |
| Class 4         | 41.3 $\pm$ 38.0 | 20.5 $\pm$ 17.4 | 15.7 $\pm$ 13.2 | 20.7 $\pm$ 54.8 | 36.4 $\pm$ 68.0  |
| Class 5         | 43.1 $\pm$ 38.0 | 22.2 $\pm$ 17.5 | 18.3 $\pm$ 15.1 | 20.5 $\pm$ 55.0 | 38.9 $\pm$ 70.2  |
| Mean            | 38.9            | 18.6            | 10.4            | 18.5            | 28.9             |
| Late fire       |                 |                 |                 |                 |                  |
| Class 1         | 36.1 $\pm$ 44.3 | 7.5 $\pm$ 10.8  | 4.2 $\pm$ 7.2   | 7.6 $\pm$ 44.3  | 11.9 $\pm$ 51.6  |
| Class 2         | 44.2 $\pm$ 45.5 | 12.2 $\pm$ 12.2 | 5.5 $\pm$ 5.7   | 9.8 $\pm$ 51.9  | 15.4 $\pm$ 57.6  |
| Class 3         | 47.0 $\pm$ 45.7 | 14.3 $\pm$ 12.6 | 7.1 $\pm$ 5.8   | 14.1 $\pm$ 64.9 | 21.3 $\pm$ 70.7  |
| Class 4         | 49.7 $\pm$ 45.8 | 16.5 $\pm$ 12.8 | 10.5 $\pm$ 7.4  | 20.1 $\pm$ 79.7 | 30.6 $\pm$ 87.2  |
| Class 5         | 51.6 $\pm$ 45.8 | 18.1 $\pm$ 13.0 | 11.5 $\pm$ 7.8  | 28.2 $\pm$ 95.2 | 39.7 $\pm$ 103.1 |
| Mean            | 45.7            | 13.7            | 7.7             | 15.9            | 23.7             |
| No-fire         |                 |                 |                 |                 |                  |
| Class 1         | 28.3 $\pm$ 43.4 | 3.1 $\pm$ 5.4   | 2.3 $\pm$ 4.4   | 4.7 $\pm$ 40.9  | 7.0 $\pm$ 45.3   |
| Class 2         | 45.0 $\pm$ 48.1 | 8.1 $\pm$ 8.2   | 5.2 $\pm$ 5.6   | 6.6 $\pm$ 51.1  | 11.9 $\pm$ 56.8  |
| Class 3         | 49.3 $\pm$ 48.5 | 10.3 $\pm$ 9.0  | 5.2 $\pm$ 4.1   | 9.7 $\pm$ 66.2  | 14.9 $\pm$ 70.3  |
| Class 4         | 52.1 $\pm$ 48.7 | 12.3 $\pm$ 9.3  | 7.4 $\pm$ 4.9   | 12.1 $\pm$ 77.4 | 19.6 $\pm$ 82.4  |
| Class 5         | 54.2 $\pm$ 48.7 | 14.3 $\pm$ 9.4  | 9.9 $\pm$ 6.1   | 14.0 $\pm$ 84.4 | 24.0 $\pm$ 90.6  |
| Mean            | 45.7            | 9.6             | 6               | 9.4             | 15.4             |

*Andropogon schirensis*

|                 | $y_i$      | $S_i$     | $\tau_{1,i}$ | $\Omega_i$ | $\Lambda_i$ |
|-----------------|------------|-----------|--------------|------------|-------------|
| Early fire      |            |           |              |            |             |
| Class 1         | 13.2± 20.6 | 9.9± 15.9 | 5.3±10.5     | 11.7±22.4  | 17.0±32.9   |
| Class 2         | 24.1±23.8  | 19.5±19.0 | 6.2±6.1      | 15.3±25.1  | 21.6±31.3   |
| Class 3         | 25.9±24.0  | 21.2±19.3 | 7.5±5.9      | 21.9±28.7  | 29.4±34.6   |
| Class 4         | 27.6±24.1  | 22.9±19.4 | 12.2±9.5     | 24.5±29.8  | 36.8±39.4   |
| Class 5         | 29.3±24.1  | 24.5±19.4 | 15.8±12.1    | 50.3±26.9  | 66.2±39.1   |
| Mean            | 22.9       | 19.6      | 9.4          | 24.7       | 34.2        |
| Mid-season fire |            |           |              |            |             |
| Class 1         | 46.3±69.9  | 16.1±29.2 | 8.8±20.0     | 16.7±68.6  | 25.6±88.6   |
| Class 2         | 72.5±76.7  | 32.9±36.0 | 10.8±13.8    | 25.4±84.9  | 36.3±98.7   |
| Class 3         | 79.7±77.1  | 39.3±36.7 | 7.6±5.8      | 38.6±104.2 | 46.3±110.0  |
| Class 4         | 81.3±77.2  | 40.7±36.8 | 10.8±8.1     | 48.8±116.4 | 59.6±124.5  |
| Class 5         | 81.3±77.2  | 40.6±36.8 | 20.6±18.2    | 43.2±110.5 | 63.8±128.7  |
| Mean            | 72.2       | 33.9      | 11.7         | 34.5       | 46.3        |
| Late fire       |            |           |              |            |             |
| Class 1         | 53.6±59.4  | 1.6±1.5   | 1.3±1.2      | 2.4±66.6   | 3.7±67.9    |
| Class 2         | 61.0±59.9  | 3.7±2.3   | 2.9±1.5      | 3.0±79.2   | 5.9±80.7    |
| Class 3         | 61.9±59.9  | 4.2±2.4   | 3.8±2.1      | 2.9±79.3   | 6.7±81.4    |
| Class 4         | 63.1±59.9  | 5.3±2.4   | 5.1±2.3      | 3.3±85.4   | 8.4±87.8    |
| Class 5         | NaN        | NaN       | NaN          | 3.3±87.2   | NaN         |
| Mean            | 59.9       | 3.7       | 3.2          | 2.9        | 6.1         |
| No-fire         |            |           |              |            |             |
| Class 1         | 8.2±11.8   | 3.4±4.7   | 2.2±3.4      | 5.2±14.9   | 7.5±18.3    |
| Class 2         | 13.0±13.2  | 6.5±5.7   | 4.3±3.7      | 6.1±16.5   | 10.5±20.3   |
| Class 3         | 14.6±13.6  | 7.6±6.1   | 5.0±3.7      | 6.9±18.2   | 11.9±21.9   |
| Class 4         | 17.4±14.0  | 9.7±6.6   | 8.3±5.4      | 7.4±19.3   | 15.8±24.7   |
| Class 5         | 8.2±14.2   | 12.0±6.9  | 8.5±4.7      | 8.9±22.1   | 17.5±26.9   |
| Mean            | 12.2       | 7.8       | 5.6          | 6.9        | 12.6        |

*Hyparrhenia diplandra*

|                 | $y_i$      | $S_i$     | $\tau_{1,i}$ | $\Omega_i$ | $\Lambda_i$ |
|-----------------|------------|-----------|--------------|------------|-------------|
| Early fire      |            |           |              |            |             |
| Class 1         | 45.6±60.7  | 6.7±11.5  | 4.7±9.2      | 10.4±69.7  | 15.1±78.9   |
| Class 2         | 62.0±63.6  | 14.4±14.7 | 6.2±6.8      | 13.4±79.9  | 19.6±86.7   |
| Class 3         | 65.3±63.8  | 16.8±15.1 | 7.0±5.8      | 15.4±87.0  | 22.5±92.9   |
| Class 4         | 67.7±63.9  | 18.8±15.3 | 10.6±7.7     | 17.8±94.9  | 28.5±102.6  |
| Class 5         | 67.9± 63.9 | 18.8±15.5 | 10.1±8.4     | 19.5±100.5 | 29.7±109.0  |
| Mean            | 61.7       | 15.1      | 7.7          | 15.3       | 23          |
| Mid-season fire |            |           |              |            |             |
| Class 1         | 15.4±25.5  | 4.7±8.3   | 2.8±6.0      | 6.6±27.4   | 9.5±33.5    |
| Class 2         | 28.6±30.1  | 11.5±11.8 | 6.0±6.4      | 9.8±34.6   | 15.8±41.1   |
| Class 3         | 32.4±30.5  | 14.4±12.4 | 6.2±4.5      | 13.2±41.3  | 19.5±45.9   |
| Class 4         | 34.7±30.7  | 16.3±12.6 | 8.6±5.8      | 18.1±49.1  | 26.7±55.0   |
| Class 5         | 35.9±30.7  | 17.4±12.8 | 12.8±9.4     | 16.7±48.1  | 29.6±57.6   |
| Mean            | 29.3       | 12.8      | 7.2          | 12.8       | 20.2        |
| Late fire       |            |           |              |            |             |
| Class 1         | 13.4±16.3  | 2.1±2.4   | 1.7±2.0      | 3.2±19.6   | 4.9±21.7    |
| Class 2         | 17.8±16.9  | 4.4±3.1   | 3.3±2.1      | 3.3±20.5   | 6.7±22.7    |
| Class 3         | 18.6±16.9  | 5.0±3.2   | 3.9±2.3      | 4.1±24.2   | 8.0±26.6    |
| Class 4         | 19.6±17.0  | 5.7±3.4   | 5.3±3.2      | 4.8±27.1   | 10.2±30.3   |
| Class 5         | 20.5±17.0  | 6.5±3.4   | 6.0±3.1      | 8.6±38.1   | 14.7±41.3   |
| Mean            | 17.9       | 4.7       | 4            | 4.8        | 8.9         |
| No-fire         |            |           |              |            |             |
| Class 1         | 12.8±19.2  | 3.9±6.3   | 2.8±5.0      | 6.4±23.7   | 9.3±28.7    |
| Class 2         | 21.2±21.6  | 8.7±8.3   | 4.7±4.5      | 8.2±27.3   | 13.0±31.9   |
| Class 3         | 23.7±21.8  | 10.6±8.7  | 5.7±4.1      | 9.6±30.1   | 15.4±34.2   |
| Class 4         | 25.5±21.9  | 12.2±8.8  | 8.8±5.8      | 10.5±31.6  | 19.3±37.5   |
| Class 5         | 26.5±22.0  | 13.1±8.9  | 10.5±6.9     | 11.3±32.9  | 21.8±39.8   |
| Mean            | 21.9       | 9.7       | 6.5          | 9.2        | 15.7        |

*Loudetia simplex*

|                 | $y_i$     | $S_i$        | $\tau_{1,i}$ | $\Omega_i$ | $\Lambda_i$ |
|-----------------|-----------|--------------|--------------|------------|-------------|
| Early fire      |           |              |              |            |             |
| Class 1         | 13.2±17.0 | -246.7±238.5 | 40.9±48.3    | -196.5±NaN | -155.6±NaN  |
| Class 2         | 18.7±17.9 | -238.1±238.6 | 6.7±6.3      | -212.6±NaN | -205.9±NaN  |
| Class 3         | 20.3±18.0 | -236.2±238.6 | 9.6±7.7      | -269.9±NaN | -260.3±NaN  |
| Class 4         | 21.5±18.1 | -234.9±238.7 | 181.6±178.3  | -275.1±NaN | -93.5±NaN   |
| Class 5         | 22.4±18.1 | -234.0±238.7 | 188.8±185.1  | -788.9±NaN | -600.0±NaN  |
| Mean            | 19.2      |              | 85.5         |            |             |
| Mid-season fire |           |              |              |            |             |
| Class 1         | 34.1±35.6 | 5.2±5.7      | 1.9±2.3      | 6.0±46.2   | 8.0±48.6    |
| Class 2         | 37.5±35.7 | 7.8±6.1      | 4.7±3.2      | 7.0±50.8   | 11.7±54.1   |
| Class 3         | 37.9±35.7 | 8.1±6.1      | 6.2±4.6      | 6.8±50.3   | 13.1±55.0   |
| Class 4         | 38.4±35.7 | 8.5±6.1      | 8.1±5.9      | 7.0±51.2   | 15.1±57.2   |
| Class 5         | 40.3±35.8 | 10.2±6.2     | 9.4±6.1      | 7.4±53.1   | 16.8±59.3   |
| Mean            | 37.6      | 7.9          | 6            | 6.8        | 12.9        |
| Late fire       |           |              |              |            |             |
| Class 1         | 12.0±14.6 | 2.0±2.1      | 1.5±1.7      | 2.8±17.5   | 4.4±19.3    |
| Class 2         | 16.1±15.1 | 4.1±2.7      | 2.9±1.7      | 3.4±20.0   | 6.3±21.7    |
| Class 3         | 17.6±15.2 | 5.1±3.0      | 4.1±2.2      | 3.9±22.2   | 8.0±24.4    |
| Class 4         | 18.7±15.2 | 6.1±3.0      | 6.0±2.9      | 4.2±23.9   | 10.3±26.9   |
| Class 5         | 19.0±15.2 | 6.4±3.0      | 6.3±3.0      | 3.8±22.5   | 10.2±25.5   |
| Mean            | 16.6      | 4.7          | 3.3          | 3.6        | 7.8         |
| No-fire         |           |              |              |            |             |
| Class 1         |           |              |              |            |             |
| Class 2         |           |              |              |            |             |
| Class 3         | -         | -            | -            | -          | -           |
| Class 4         |           |              |              |            |             |
| Class 5         |           |              |              |            |             |
| Mean            |           |              |              |            |             |

## Figures

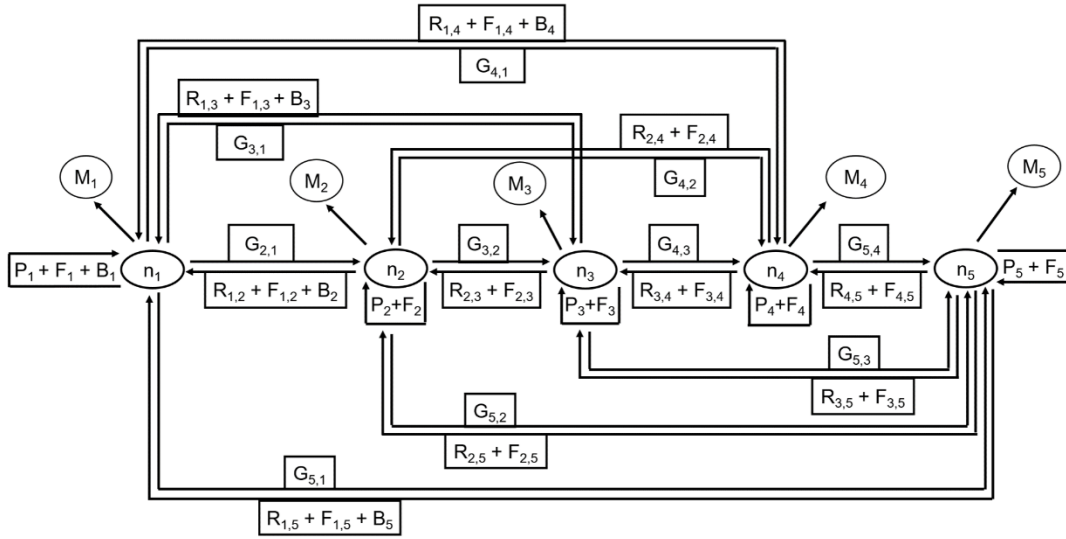

**Figure S1:** Life-cycle diagram of the five size-class matrix model from Koffi et al. (2022). The letters denote: (n) the number of individuals in each class, (M) the mortality, (G) the probability of surviving and reaching a larger size-class, (P) the probability of surviving and staying in the same size-class, (R) the probability of surviving and retrogression to a smaller size-class, (F) the probability of new tussocks apparition through fragmentation and (B) the production of new tussocks through seed production. The subscript letters (i,j) denote a transition from size-class j to size-class i (or a production of tussocks in size-class i by individuals in size-class j).
